# Supplementary material
Source: Royal Society of Chemistry journal article supplement (doi:10.1039/d6ta01564f)
Supplement: d6ta01564f1.pdf [file d6ta01564f1.pdf]

## Supporting Information

### **Interfacial In-S<sub>V</sub>-N bond mediated d/p-band center up-shift in a S-scheme heterojunction for boosting photocatalytic H<sub>2</sub> evolution**

Xue Jiang,<sup>a</sup> Sheng Guo,<sup>a</sup> Chaofan Yuan,<sup>a</sup> Na Tian,<sup>\*,a</sup> Ning Zhang,<sup>b</sup> Qian Zhang,<sup>b</sup> Fang Chen,<sup>a</sup> Yihe Zhang,<sup>a</sup> Hongwei Huang<sup>\*,a</sup>

<sup>a</sup>Engineering Research Center of Ministry of Education for Geological Carbon Storage and Low Carbon Utilization of Resources, Beijing Key Laboratory of Materials Utilization of Nonmetallic Minerals and Solid Wastes, National Laboratory of Mineral Materials, Hebei Key Laboratory of Resource Low-carbon Utilization and New Materials, School of Materials Science and Technology, China University of Geosciences (Beijing), 100083, China

<sup>b</sup> School of Resources and Environmental Engineering, Shandong University of Technology, 255049 Zibo, PR China

\*Corresponding author: tianna65@cugb.edu.cn (N. Tian); hhw@cugb.edu.cn (H.W. Huang)

## Table of Contents

|                                                                                                                         |    |
|-------------------------------------------------------------------------------------------------------------------------|----|
| Results and Discussion .....                                                                                            | 3  |
| 1. XRD, FT-IR, SEM and EDS elemental mapping images of as-synthesized catalysts ....                                    | 3  |
| 2. N <sub>2</sub> adsorption–desorption isotherms and pore size distributions results of as-synthesized catalysts ..... | 4  |
| 3. XPS spectra of as-prepared samples .....                                                                             | 5  |
| 4. Optical property and band structure of ZIS .....                                                                     | 7  |
| 5. VB-XPS of CN and S <sub>V</sub> -ZIS .....                                                                           | 7  |
| 6. PDOS of CN, ZIS and S <sub>V</sub> -ZIS .....                                                                        | 8  |
| 7. Photo-deposition experiment .....                                                                                    | 8  |
| 8. Wavelength-dependent apparent quantum efficiency for ZIS/5CN .....                                                   | 10 |
| 9. XRD, SEM and HRTEM image of the S <sub>V</sub> -ZIS/5CN catalyst after the cycle .....                               | 10 |
| 10. surface potential distribution and PL spectra of the samples .....                                                  | 11 |
| 11. AQE data .....                                                                                                      | 11 |
| 12. Comparison of the H <sub>2</sub> evolution efficiency .....                                                         | 12 |
| 13. Summary of the fitting parameters for the TR-PL decay curves.....                                                   | 14 |

## Results and Discussion

### 1. XRD, FT-IR, SEM and EDS elemental mapping images of as-synthesized catalysts

FT-IR spectra (Fig. S1b) reveal a pronounced hydroxyl peak at  $3000\text{-}3600\text{ cm}^{-1}$  for  $S_V\text{-ZIS}$  and  $S_V\text{-ZIS/CN}$ , which is absent in pristine ZIS and ZIS/5CN. This indicates that introducing S-vacancies promotes surface hydroxyl adsorption, forming a protective layer that enhances photostability by inhibiting ZIS self-degradation. Furthermore, the spectrum of  $S_V\text{-ZIS/CN}$  exhibits characteristic peaks of both CN and  $S_V\text{-ZIS}$ , corroborating its successful synthesis<sup>1,2</sup>.

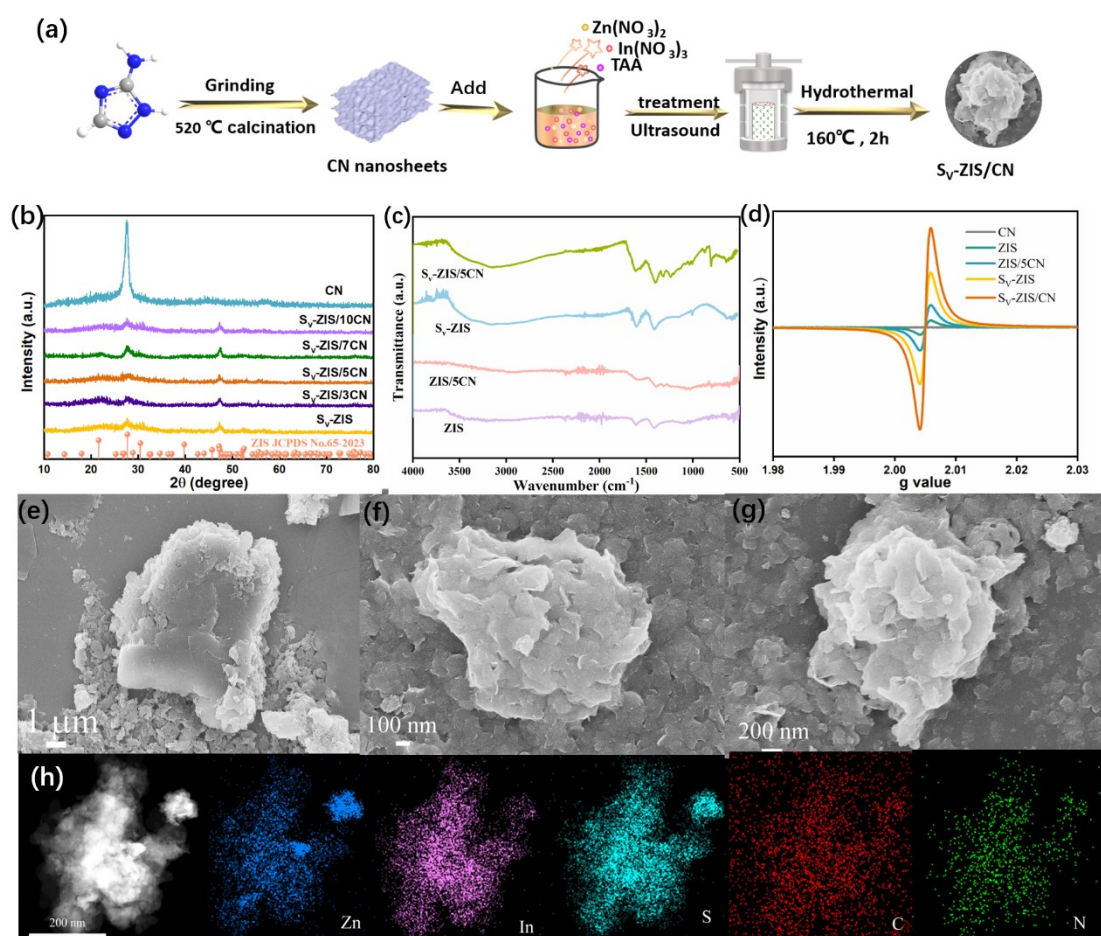

Fig. S1 (a) Scheme illustration of  $S_V$ -ZIS/CN heterojunction, (b) XRD patterns, (c) FTIR results of ZIS, ZIS/5CN,  $S_V$ -ZIS and  $S_V$ -ZIS/5CN heterojunction, (d) Quantitative EPR test of samples, SEM images of (e) CN, (f)  $S_V$ -ZIS and (g)  $S_V$ -ZIS/5CN and EDS elements mapping images (h) of  $S_V$ -ZIS/5CN heterojunction.

## 2. $N_2$ adsorption–desorption isotherms and pore size distributions results of as-synthesized catalysts

The nitrogen adsorption–desorption curve can more clearly show the changes in specific surface area and porosity. The nitrogen adsorption-desorption isotherms (Fig. S2a) showed a typical IV-type isotherm, and the Barrett-Joyner-Hall (BJH) pore size distribution curve (Fig. S2b) indicated that the samples had mesoporous characteristics<sup>3,4</sup>. Compared with ZIS ( $105.69 \text{ m}^2 \text{ g}^{-1}$ ) and ZIS/CN ( $95.63 \text{ m}^2 \text{ g}^{-1}$ ), the specific surface areas of  $S_V$ -ZIS and  $S_V$ -ZIS/5CN samples after introducing S vacancies were both increased, reaching  $118.30 \text{ m}^2 \text{ g}^{-1}$  and  $101.02 \text{ m}^2 \text{ g}^{-1}$ , which were higher than that of the CN ( $5.32 \text{ m}^2 \text{ g}^{-1}$ ).

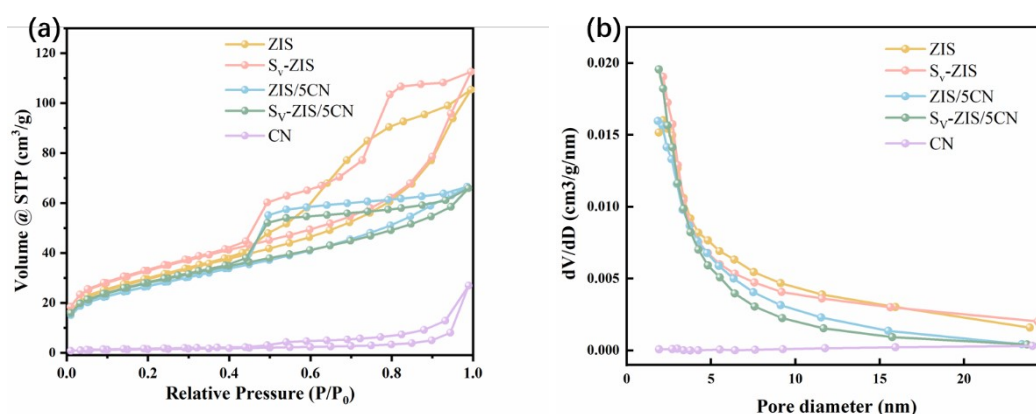

Fig. S2 (a)  $N_2$  adsorption–desorption isotherms and (b) pore size distributions results of CN, ZIS, ZIS/5CN,  $S_V$ -ZIS and  $S_V$ -ZIS/5CN composite.

Table S1. BET surface area and average pore diameters of ZIS, S<sub>V</sub>-ZIS, ZIS/5CN, S<sub>V</sub>-ZIS/5CN and CN.

| Sample                  | Surface area (m <sup>2</sup> g <sup>-1</sup> ) | Average pore diameter (nm) |
|-------------------------|------------------------------------------------|----------------------------|
| ZIS                     | 105.6916                                       | 5.4702                     |
| S <sub>V</sub> -ZIS     | 118.2983                                       | 5.4230                     |
| ZIS/5CN                 | 95.6263                                        | 4.0761                     |
| S <sub>V</sub> -ZIS/5CN | 101.0246                                       | 4.0883                     |
| CN                      | 5.3236                                         | 14.2949                    |

### 3. XPS spectra of as-prepared samples

The full-band spectra of all the samples are shown in Fig. S3a, the CN monomer consists of C 1s and N 1s spectral signature signals, and the S<sub>V</sub>-ZIS monomer consists of Zn 2p, In 3d, and S 2p spectral signature signals. The elemental signature peaks of the S<sub>V</sub>-ZIS/CN corresponded to the two pure semiconductors, which proved that the two semiconductors were successfully composited together. Two peaks (1022.77 and 1045.91 eV) were divided in the Zn 2p spectra of ZIS in Fig. S3a, classifying as Zn 2p<sub>3/2</sub> and Zn 2p<sub>1/2</sub><sup>5</sup>, respectively. The In 3d spectrum of ZIS (Fig. S3b) reveals deconvoluted In 3d<sub>5/2</sub> and In 3d<sub>3/2</sub> peaks centered at 445.28 and 4552.87 eV<sup>6</sup>.

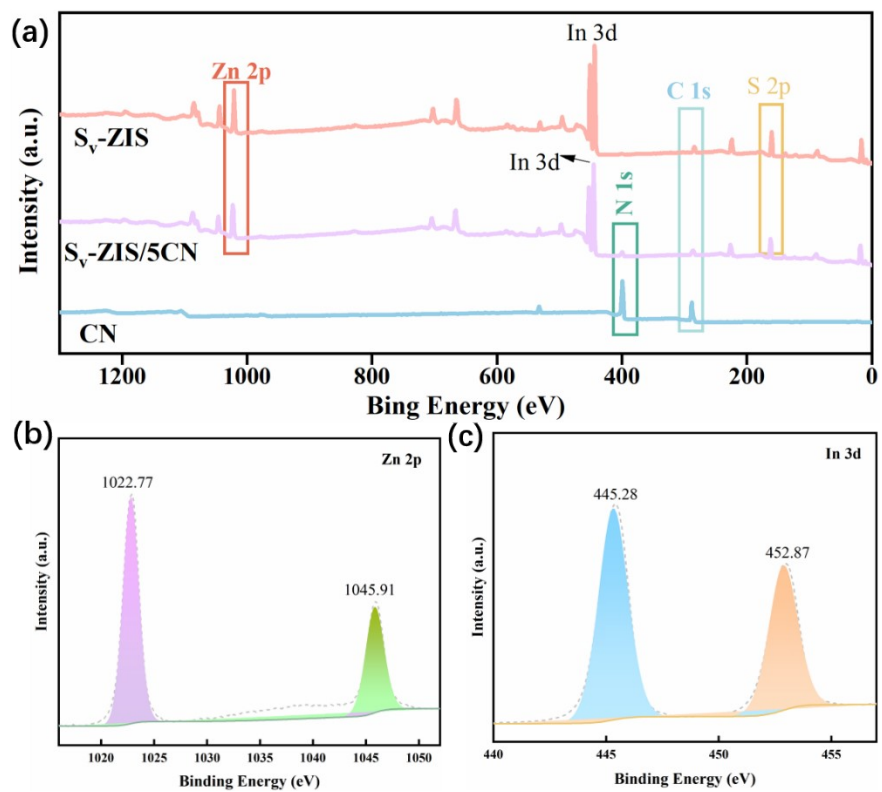

Fig. S3 (a) Typical XPS survey spectra of CN,  $S_V$ -ZIS and  $S_V$ -ZIS/5CN heterojunction, high-resolution XPS of (b) Zn 2p and (c) In 3d of ZIS.

#### 4. Optical property and band structure of ZIS

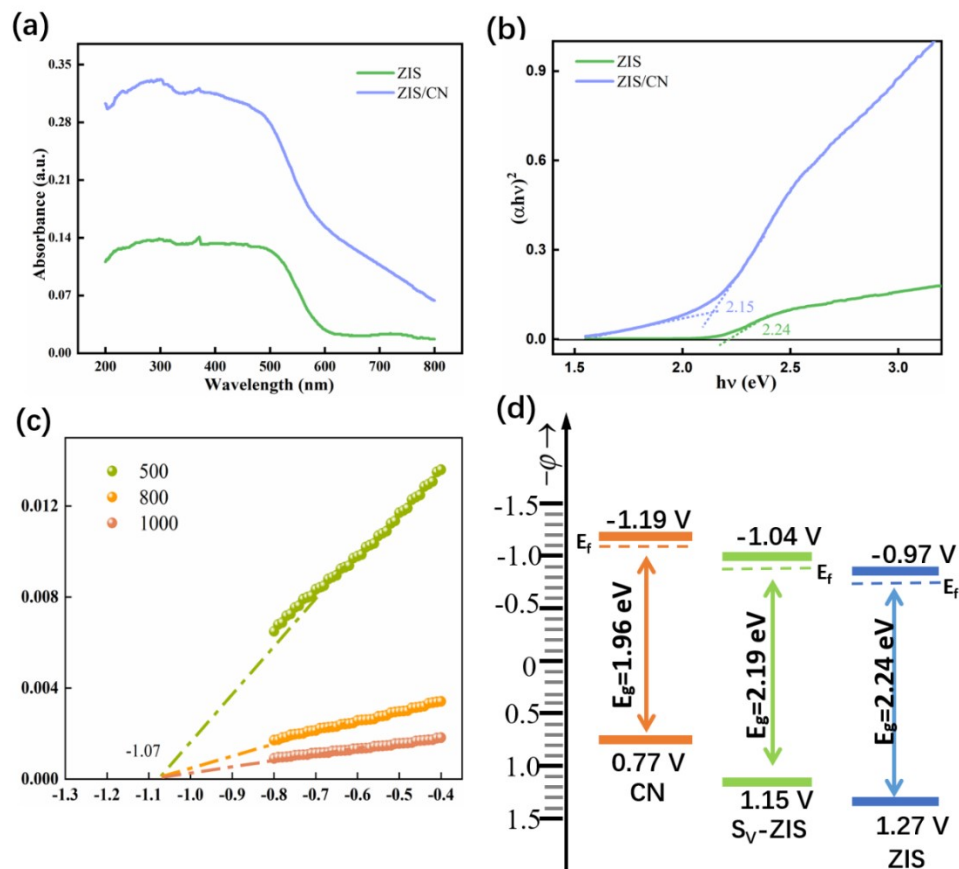

Fig. S4 (a) DRS and (b)  $E_g$  of ZIS and ZIS/CN. (c) M-S plots of ZIS, (d) band structures of CN, S<sub>V</sub>-ZIS and ZIS.

#### 5. VB-XPS of CN and S<sub>V</sub>-ZIS

The experimental VB positions of CN (1.0 eV) and S<sub>V</sub>-ZIS (1.37 eV) are obtained from the XPS valence band spectra. The actual values of CN (0.78 V) and S<sub>V</sub>-ZIS (1.15 V) are calculated by using  $E_{\text{NHE}}/V = \phi + f - 4.44$  ( $E_{\text{NHE}}$ : the potential of the normal hydrogen electrode;  $\phi$ : Instrumental work function ( $\phi = 4.2$  eV);  $f$ : the test value of VB spectra)<sup>7</sup>.

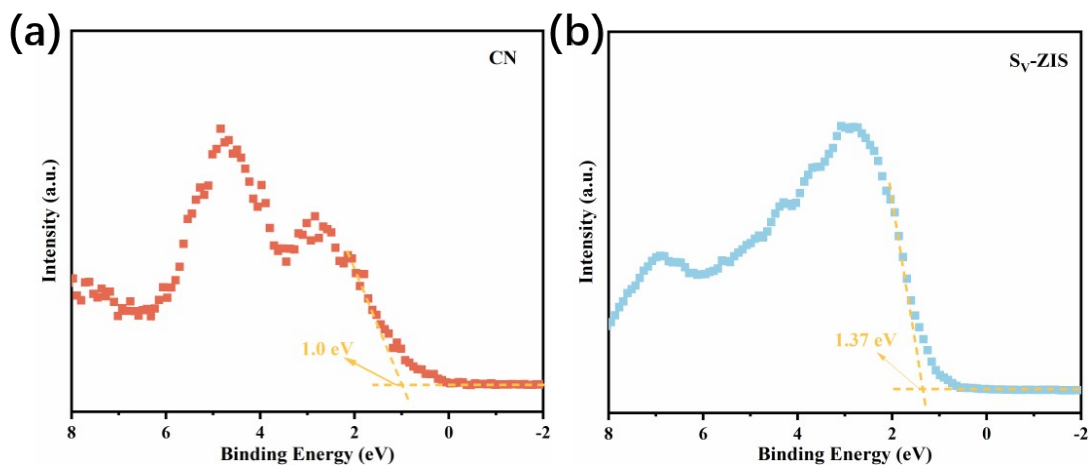

Fig. S5 VB XPS spectra of (a) CN and (b)  $S_V$ -ZIS.

## 6. PDOS of CN, ZIS and $S_V$ -ZIS

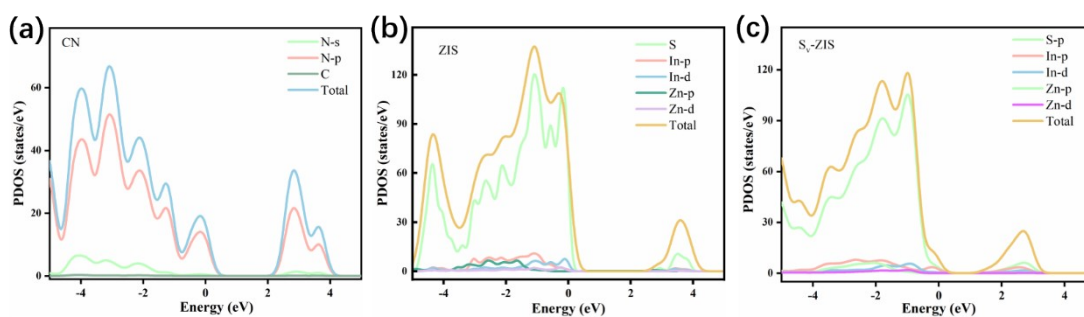

Fig. S6 DOS distribution maps of CN, ZIS and  $S_V$ -ZIS.

## 7. Photo-deposition experiment

To visually illustrate the spatial separation and migration paths of photogenerated carriers, a selective photodeposition experiment was conducted. This method utilized the fact that  $Mn^{2+}$  can be oxidized by photogenerated holes to form insoluble  $MnO_x$  species, while  $Ag^+$  can be reduced by photogenerated electrons to generate metal Ag nanoparticles, thereby marking the locations of hole and electron accumulation respectively.

For the photo-deposition of Ag nanoparticles (electron tracer): 20 mg of S<sub>V</sub>-ZIS/CN photocatalyst was dispersed in 50 mL of methanol-water solution (10 vol%) and an appropriate amount of AgNO<sub>3</sub> was added to achieve a nominal 5 wt% Ag loading. The mixture was stirred magnetically in the dark for 30 min to establish an adsorption-desorption equilibrium, and then continuously stirred under visible light irradiation ( $\lambda > 420$  nm) for 1 h to drive the reduction process.

For the photo-deposition of MnO<sub>x</sub> (hole tracer): 20 mg of S<sub>V</sub>-ZIS/CN photocatalyst was suspended in 50 mL of water solution containing MnCl<sub>2</sub> (0.1 mg/mL) and KIO<sub>3</sub> (0.4 mM). After stirring in the dark for 30 min, the mixture was placed under visible light irradiation for 2 h. After the irradiation, all the products were collected by centrifugation, thoroughly washed with deionized water, and dried for subsequent microscopic analysis to determine the deposition location.

The charge migration pathways during the photocatalytic process were further verified by selectively depositing the metals Ag and MnO<sub>x</sub>. Under light conditions, when Ag was deposited alone, it could be observed that Ag particles were deposited on the CN surface (Fig. S7a). This indicates that the photogenerated electrons are more likely to exist on the CN surface, meaning that the reduction sites are located on the CN surface. Furthermore, it was found that the MnOX nanosheets were deposited on the surface of S<sub>V</sub>-ZIS (Fig. S7b), indicating that photogenerated holes gathered on the surface of S<sub>V</sub>-ZIS. Therefore, there were oxidation sites on the S<sub>V</sub>-ZIS surface that participated in the oxidation reaction. The optical deposition experiment further confirmed the existence of the S-scheme heterojunction.

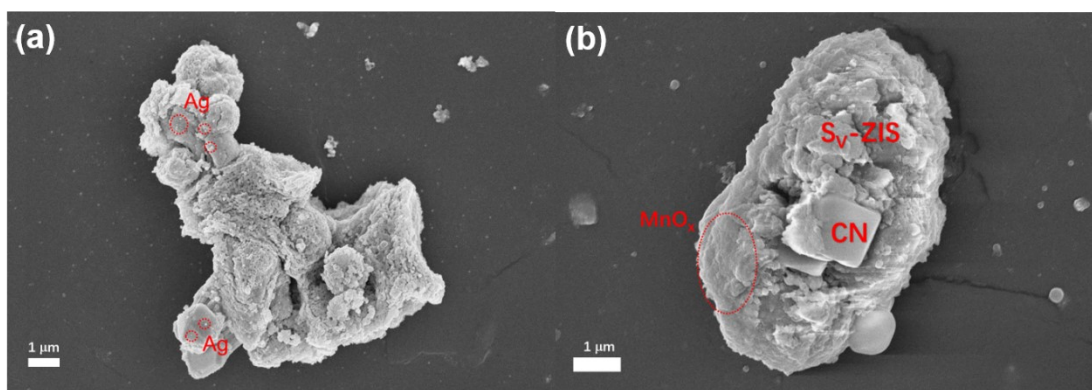

Fig. S7 SEM image after the experiments of depositing (a) Ag and (b) MnO<sub>x</sub> by photo-deposition on the S<sub>V</sub>-ZIS/CN.

### 8. Wavelength-dependent apparent quantum efficiency for ZIS/5CN

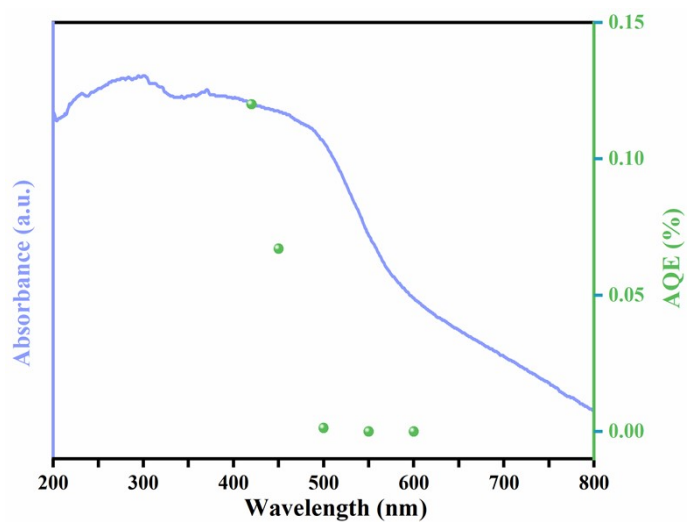

Fig. S8. Wavelength-dependent apparent quantum efficiency of ZIS/5CN composite.

### 9. XRD, SEM and HRTEM image of the S<sub>V</sub>-ZIS/5CN catalyst after the cycle

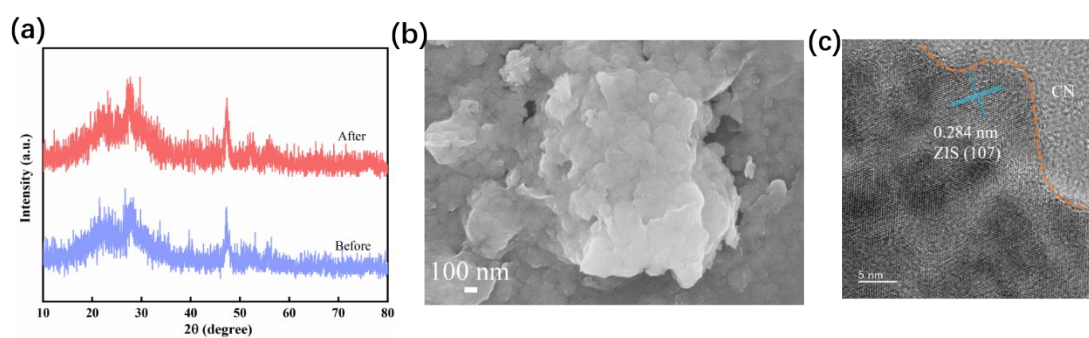

Fig. S9. (a) XRD, (b) SEM and (c) TEM image of the  $S_V$ -ZIS/5CN catalyst after the four-cycle.

## 10. surface potential distribution and PL spectra of the samples

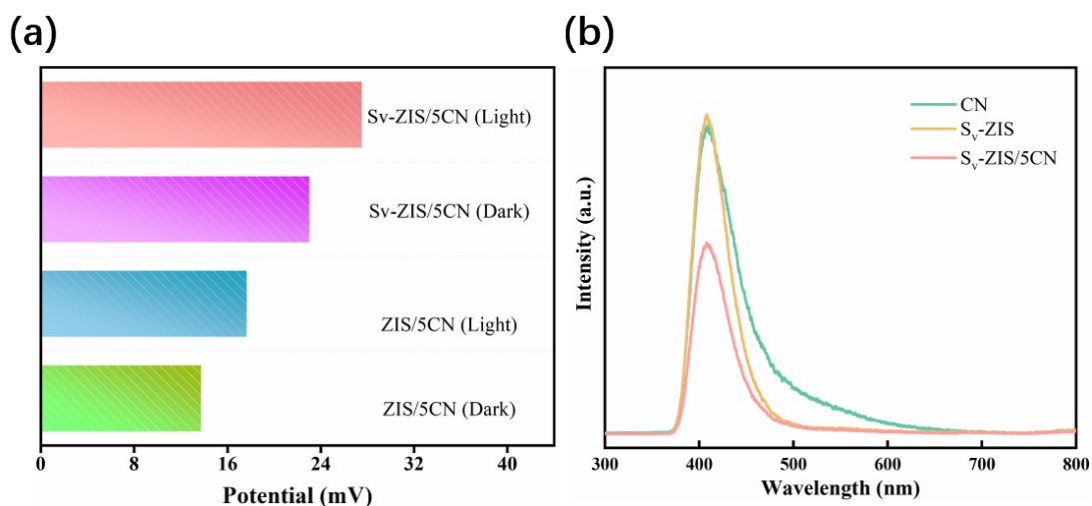

Fig. S10. (a) The surface potentials of ZIS/5CN and  $S_V$ -ZIS/5CN under dark and light conditions. (b) PL spectra of CN,  $S_V$ -ZIS and  $S_V$ -ZIS/5CN catalyst.

## 11. AQE data

Table S2. AQE data.

| Wavelength (nm) | Light intensity (W) | H <sub>2</sub> evolution rate (mmol/g/h) | AQE (%) |
|-----------------|---------------------|------------------------------------------|---------|
| 420             | 0.142               | 2.92388                                  | 7.45    |
| 450             | 0.140               | 1.01212                                  | 2.41    |
| 500             | 0.136               | 0.5009                                   | 1.07    |
| 550             | 0.133               | 0.1339                                   | 0.26    |
| 600             | 0.127               | 0                                        | 0       |
| 650             | 0.121               | 0                                        | 0       |

Table S3. Comparison of AQEs with previously reported ZnIn<sub>2</sub>S<sub>4</sub>-based semiconductor photocatalysts.

| Photocatalyst                                                                       | Wave length (nm) | Light intensity (mW cm <sup>-2</sup> ) | AQE (%) | Ref.      |
|-------------------------------------------------------------------------------------|------------------|----------------------------------------|---------|-----------|
| S <sub>V</sub> -ZnIn <sub>2</sub> S <sub>4</sub> /C <sub>3</sub> N <sub>5</sub>     | 420              | 45.2                                   | 7.45    | This work |
| ZnIn <sub>2</sub> S <sub>4</sub> /MOF                                               | 365              | 5.1                                    | 2.57    | 8         |
| S <sub>V</sub> -ZnIn <sub>2</sub> S <sub>4</sub>                                    | 420              | 86.82                                  | 0.16    | 9         |
| ZnIn <sub>2</sub> S <sub>4</sub> /CdS                                               | 420              | 44.76                                  | 12.6    | 10        |
| MoS <sub>2</sub> /O-ZnIn <sub>2</sub> S <sub>4</sub>                                | 420              | 70                                     | ~2.53   | 11        |
| ZnMoO <sub>4</sub> @ ZnIn <sub>2</sub> S <sub>4</sub>                               | 420              | /                                      | 8.32    | 12        |
| N-CeO <sub>2</sub> -δ@ZnIn <sub>2</sub> S <sub>4</sub>                              | 420              | /                                      | 15.9    | 13        |
| TiO <sub>2</sub> -ZnIn <sub>2</sub> S <sub>4</sub>                                  | 420              | 19.75                                  | 1.1     | 14        |
| BiVO <sub>4</sub> @ZnIn <sub>2</sub> S <sub>4</sub> /Ti <sub>3</sub> C <sub>2</sub> | 410              | /                                      | 2.4     | 15        |
| ZnIn <sub>2</sub> S <sub>4</sub> /NiWO <sub>4</sub>                                 | 420              | 10.1                                   | 9.69    | 16        |
| S-g-C <sub>3</sub> N <sub>4</sub> /ZnIn <sub>2</sub> S <sub>4</sub>                 | 420              | /                                      | 34.43   | 17        |

## 12. Comparison of the H<sub>2</sub> evolution efficiency

Table S4. Comparison of the hydrogen evolution efficiency of representative C<sub>3</sub>N<sub>5</sub> and ZnIn<sub>2</sub>S<sub>4</sub>-based photocatalysts.

| Photocatalyst                                                    | Sacrificial agent | Cocatalyst/ sensitizer | Light source            | Activity (mmol h <sup>-1</sup> g <sup>-1</sup> ) | Reference |
|------------------------------------------------------------------|-------------------|------------------------|-------------------------|--------------------------------------------------|-----------|
| ZnIn <sub>2</sub> S <sub>4</sub> / C <sub>3</sub> N <sub>5</sub> | 10 vol% TEOA      | 1 wt% Pt               | 300 W Xe lamp (>420 nm) | 4.85                                             | This work |
| C <sub>3</sub> N <sub>4</sub> /rGO/C <sub>3</sub> N <sub>5</sub> | 10 vol% TEOA      | /                      | 300 W Xe lamp (>400 nm) | 0.32                                             | 18        |
| V <sub>2</sub> O <sub>5</sub> /C <sub>3</sub> N <sub>5</sub>     | 10 vol% TEOA      | 0.2 wt% Pt             | 300 W Xe lamp (>420 nm) | 0.33                                             | 19        |
| CoFe <sub>2</sub> O <sub>4</sub> /ZnIn <sub>2</sub> S            | 20 vol% TEOA      | 3 wt% Pt               | 300 W Xe lamp           | 0.80                                             | 20        |

|                                                                    |                                                                           |          |                            |      |    |
|--------------------------------------------------------------------|---------------------------------------------------------------------------|----------|----------------------------|------|----|
| 4                                                                  |                                                                           |          | (>420 nm)                  |      |    |
| <b>C<sub>3</sub>N<sub>5</sub>/TiO<sub>2</sub></b>                  | 10 vol% TEOA                                                              | /        | 300 W Xe lamp<br>(>420 nm) | 1.83 | 21 |
| <b>BDCNN/ZnIn<sub>2</sub>S<sub>4</sub></b>                         | 10 vol% TEOA                                                              | 1 wt% Pt | 300 W Xe lamp<br>(>420 nm) | 2.38 | 22 |
| <b>C<sub>3</sub>N<sub>5</sub>/Ti<sub>3</sub>C<sub>2</sub></b>      | 10 vol% TEOA                                                              | 1 wt% Pt | 300 W Xe lamp<br>(>420 nm) | 2.59 | 23 |
| <b>BiVO<sub>4</sub>/C<sub>3</sub>N<sub>5</sub></b>                 | 0.4 g sodium<br>ascorbate                                                 | 1 wt% Pt | 300 W Xe lamp<br>(>420 nm) | 2.62 | 24 |
| <b>SnIn<sub>4</sub>S<sub>8</sub>/ZnIn<sub>2</sub>S<sub>4</sub></b> | 10 vol% TEOA                                                              | 3 wt% Pt | 300 W Xe lamp<br>(>420 nm) | 2.99 | 25 |
| <b>ZnIn<sub>2</sub>S<sub>4</sub>/ZnSe</b>                          | 0.25 M Na <sub>2</sub> SO <sub>3</sub><br>and 0.35 M<br>Na <sub>2</sub> S | 1 wt% Pt | 300 W Xe lamp<br>(>420 nm) | 3.33 | 6  |
| <b>C<sub>3</sub>N<sub>4</sub>/C<sub>3</sub>N<sub>5</sub></b>       | 10 vol% TEOA                                                              | 1 wt% Pt | 300 W Xe lamp<br>(>420 nm) | 3.33 | 26 |
| <b>ZnIn<sub>2</sub>S<sub>4</sub>/MXene</b>                         | 10 vol% TEOA                                                              | 3 wt% Pt | 300 W Xe lamp<br>(>420 nm) | 3.48 | 27 |
| <b>ZnIn<sub>2</sub>S<sub>4</sub>/CPCN</b>                          | 0.25 M Na <sub>2</sub> SO <sub>3</sub><br>and 0.35 M<br>Na <sub>2</sub> S | /        | 300 W Xe lamp<br>(>420 nm) | 3.49 | 28 |
| <b>MoS<sub>2</sub>/O-ZnIn<sub>2</sub>S<sub>4</sub></b>             | 0.25 M Na <sub>2</sub> SO <sub>3</sub><br>and 0.35 M<br>Na <sub>2</sub> S | /        | 300 W Xe lamp              | 4.01 | 29 |
| <b>ZnWO<sub>4</sub>/ZnIn<sub>2</sub>S<sub>4</sub></b>              | 5 vol%<br>methanol                                                        |          | 300 W Xe lamp<br>(>420 nm) | 4.93 | 30 |
| <b>ZnIn<sub>2</sub>S<sub>4</sub>/BiVO<sub>4</sub></b>              | 10 vol% TEOA                                                              | 3 wt% Pt | 300 W Xe lamp<br>(>400 nm) | 5.90 | 31 |
| <b>S-C<sub>3</sub>N<sub>4</sub>/ZnIn<sub>2</sub>S<sub>4</sub></b>  | 0.25 M Na <sub>2</sub> SO <sub>3</sub><br>and 0.35 M<br>Na <sub>2</sub> S | /        | 300 W Xe lamp<br>(>420 nm) | 8.46 | 32 |

### 13. Summary of the fitting parameters for the TR-PL decay curves

Table S5. Lifetime parameters of S<sub>V</sub>-ZIS, ZIS/5CN and S<sub>V</sub>-ZIS/5CN from the TRPL results.

| Sample                  | A <sub>1</sub> [%] | A <sub>2</sub> [%] | τ <sub>1</sub> [ns] | τ <sub>2</sub> [ns] | τ <sub>A</sub> [ns] |
|-------------------------|--------------------|--------------------|---------------------|---------------------|---------------------|
| S <sub>v</sub> -ZIS     | 994.005            | 46.564             | 1.13                | 12.42               | 4.96726             |
| ZIS/5CN                 | 891.792            | 123.125            | 1.786               | 10.9                | 5.95376             |
| S <sub>v</sub> -ZIS/5CN | 1075.801           | 68.436             | 1.006               | 16.96               | 9.2619              |

The average lifetime was calculated by using the **Equation**:

$$\tau_{\text{Ave.}} = \frac{A_1 \cdot \tau_1^2 + A_2 \cdot \tau_2^2}{A_1 \cdot \tau_1 + A_2 \cdot \tau_2}$$

## References

- 1 A. Raja, N. Son, M. Swaminathan and M. Kang, *J. Colloid. Interface. Sci.*, 2021, **602**, 669-679.
- 2 H. Che, J. Wang, X. Gao, J. Chen, P. Wang, B. Liu and Y. Ao, *J. Colloid. Interface. Sci.*, 2022, **627**, 739-748.
- 3 J. Cai, B. Liu, S. Zhang, L. Wang, Z. Wu, J. Zhang and B. Cheng, *J. Mater. Sci. Technol.*, 2024, **197**, 183-193.
- 4 Q. Liang, W. Gao, C. Liu, S. Xu and Z. Li, *J. Hazard. Mater.*, 2020, **392**.
- 5 X. Lian, Z. Huang, Y. Zhang, Z. Chen, P. Meidl, X. Yi and B. Xu, *Chemosphere*, 2023, **313**, 137351.
- 6 Y. Zhong, M. Li, X. Luan, F. Gao, H. Wu, J. Zi and Z. Lian, *Applied Catalysis B: Environmental*, 2023, **335**, 122859.
- 7 N. Tian, H. Huang, S. Wang, T. Zhang, X. Du and Y. Zhang, *Applied Catalysis B: Environmental*, 2020, **267**, 118697.
- 8 J. Cai, B. Liu, S. Zhang, L. Wang, Z. Wu, J. Zhang and B. Cheng, *J. Mater. Sci. Technol.*, 2024, **197**, 183-193.
- 9 X. Jing, N. Lu, J. Huang, P. Zhang and Z. Zhang, *J. Energy Chem.*, 2021, **58**, 397-407.
- 10 C. Li, X. Du, S. Jiang, Y. Liu, Z. Niu, Z. Liu, S. Yi and X. Yue, *Adv. Sci.*, 2022, **9**, 2201773.
- 11 Y. Peng, X. Guo, S. Xu, Y. Guo, D. Zhang, M. Wang, G. Wei, X. Yang, Z. Li, Y. Zhang and F. Tian, *J. Energy Chem.*, 2022, **75**, 276-284.
- 12 S. Wang, Q. Liu, W. Zhang, J. Liu, X. Ji, P. Cai, R. Chen, S. Liu, W. Ma, D. Zhang and X. Pu, *Carbon Neutralization*, 2025, **4**, e70054.
- 13 S. Farhan, A. Hassan Raza, S. Yang, Z. Yu and Y. Wu, *J. Colloid. Interface. Sci.*, 2024, **669**, 430-443.
- 14 G. Zuo, Y. Wang, W. L. Teo, Q. Xian and Y. Zhao, *Applied Catalysis B: Environmental*, 2021, **291**, 120126.
- 15 X. Du, T. Zhao, Z. Xiu, Z. Xing, Z. Li, K. Pan, S. Yang and W. Zhou, *Appl. Mater. Today*, 2020, **20**, 100719.
- 16 H. Lv, H. Wu, J. Zheng, Y. Kong, X. Xing, G. Wang and Y. Liu, *Colloids and Surfaces a:*

- Physicochemical and Engineering Aspects*, 2023, **666**, 131384.
- 17 T. Wang, X. Pan, M. He, L. Kang and W. Ma, *Adv. Sci.*, 2024, **11**, 2403771.
- 18 D. Liu, J. Yao, S. Chen, J. Zhang, R. Li and T. Peng, *Applied Catalysis B: Environmental*, 2022, **318**, 121822.
- 19 F. Liu, Q. Zhang, C. Chen, Z. Zhang and X. Fang, *Sol. Energy Mater. Sol. Cells*, 2023, **257**, 112385.
- 20 C. Li, H. Che, P. Huo, Y. Yan, C. Liu and H. Dong, *J. Colloid. Interface. Sci.*, 2021, **581**, 764-773.
- 21 S. Chen, X. Sheng, Y. Wang, P. Yu, C. Yang, X. Zhang, H. Fang, Y. Zhang and Y. Zhou, *Appl. Surf. Sci.*, 2024, **643**, 158600.
- 22 J. Liu, Y. Fu, G. Chu, K. Wen, L. Qiu, P. Li, L. Cheng, B. Cao, Y. Tang, X. Chen, H. Kita and S. Duo, *Process Saf. Environ. Protect.*, 2024, **191**, 883-896.
- 23 P. Yu, S. Chen, Y. Wang, J. Li, Z. Zhang, S. Zhao, Y. Zhang and Y. Zhou, *Int. J. Hydrog. Energy*, 2024, **58**, 1266-1276.
- 24 W. Wang, B. Li, J. Shi, K. Zhu, Y. Zhang, X. Liu, C. Li, F. Hu, X. Xi and S. Kawi, *Applied Catalysis B: Environment and Energy*, 2025, **362**, 124766.
- 25 R. Xiong, C. Tang, S. Liu, Y. Xiao, B. Cheng and S. Lei, *Sep. Purif. Technol.*, 2022, **295**, 121267.
- 26 N. Su, S. Cheng, P. Zhang, H. Dong, Y. Fang, X. Zhou, Y. Wang and C. Li, *Int. J. Hydrog. Energy*, 2022, **47**, 41010-41020.
- 27 G. Zuo, Y. Wang, W. L. Teo, A. Xie, Y. Guo, Y. Dai, W. Zhou, D. Jana, Q. Xian, W. Dong and Y. Zhao, *Angewandte Chemie International Edition*, 2020, **59**, 11287-11292.
- 28 C. Zhang, L. Lin, M. Zhou, Y. Wang, S. Xu, X. Chen and Z. Li, *Chem. Eng. J.*, 2024, **495**, 153563.
- 29 Y. Peng, X. Guo, S. Xu, Y. Guo, D. Zhang, M. Wang, G. Wei, X. Yang, Z. Li, Y. Zhang and F. Tian, *J. Energy Chem.*, 2022, **75**, 276-284.
- 30 M. Dai, Z. He, P. Zhang, X. Li and S. Wang, *J. Mater. Sci. Technol.*, 2022, **122**, 231-242.
- 31 J. Hu, C. Chen, Y. Zheng, G. Zhang, C. Guo and C. M. Li, *Small*, 2020, **16**, 2002988.
- 32 T. Wang, X. Pan, M. He, L. Kang and W. Ma, *Adv. Sci.*, 2024, **11**, 2403771.
